# Supplementary material for: Identification of a robust and reproducible noncluster-type SBU: effect of coexistent groups on network topologies, helicity, and properties
Source: Royal Society of Chemistry journal article supplement (doi:10.1039/c3ce40904j), 2013-01-01
Supplement: c3ce40904j.pdf [file c3ce40904j.pdf]

## Supporting Information

**Title:** Identification of a Robust and Reproducible Noncluster-type SBU: Effect of Coexistent Groups on Network Topologies, Helicity and Properties

**Authors:** Satirtha Sengupta, Sumi Ganguly, Arijit Goswami, Pradip K. Sukul, Raju Mondal\*

**Journal:** CrystEngComm

---

---

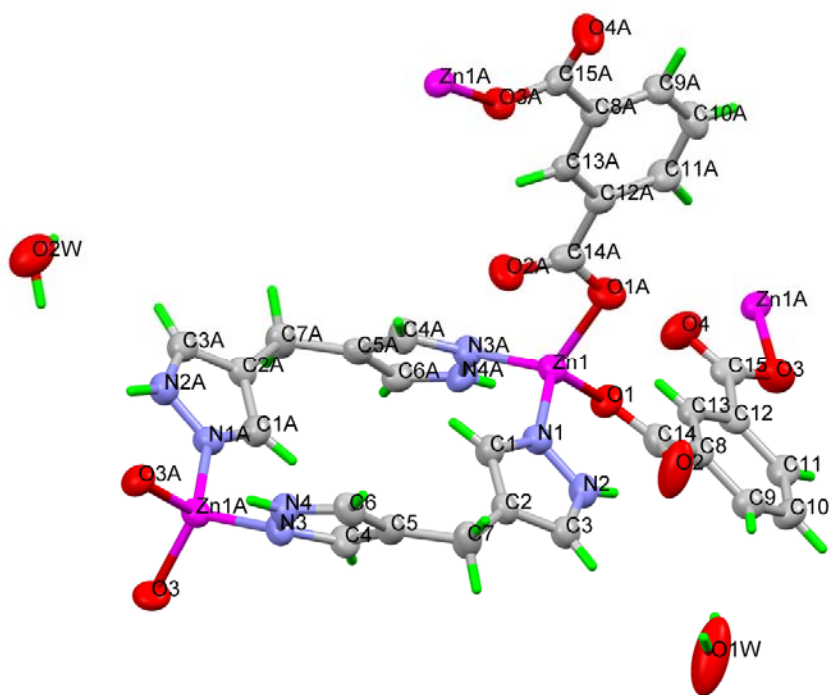

**Figure SI-1.** The coordination environment around the Zn(II) ion of compound **1**.

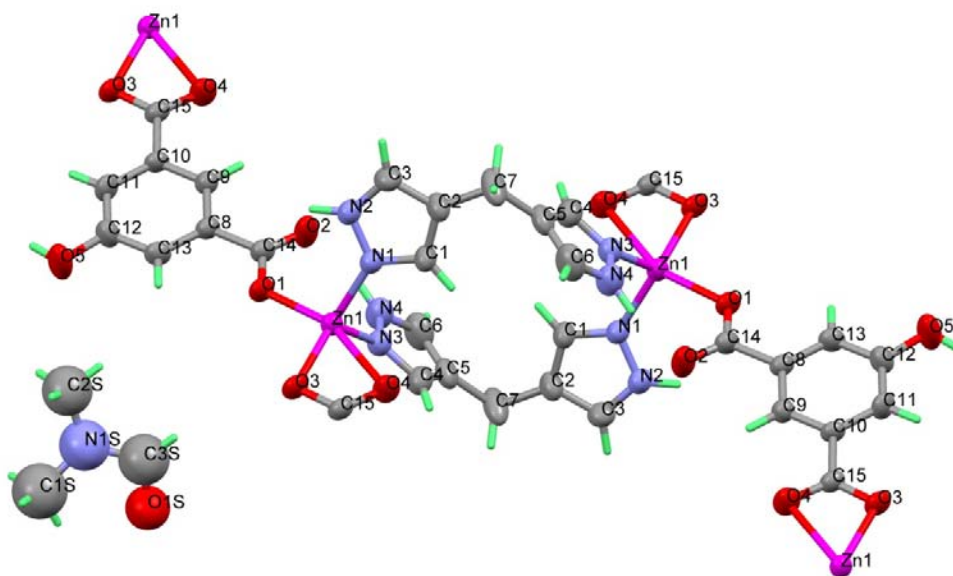

**Figure SI-2.** The coordination environment around the Zn(II) ion of compound **2**.

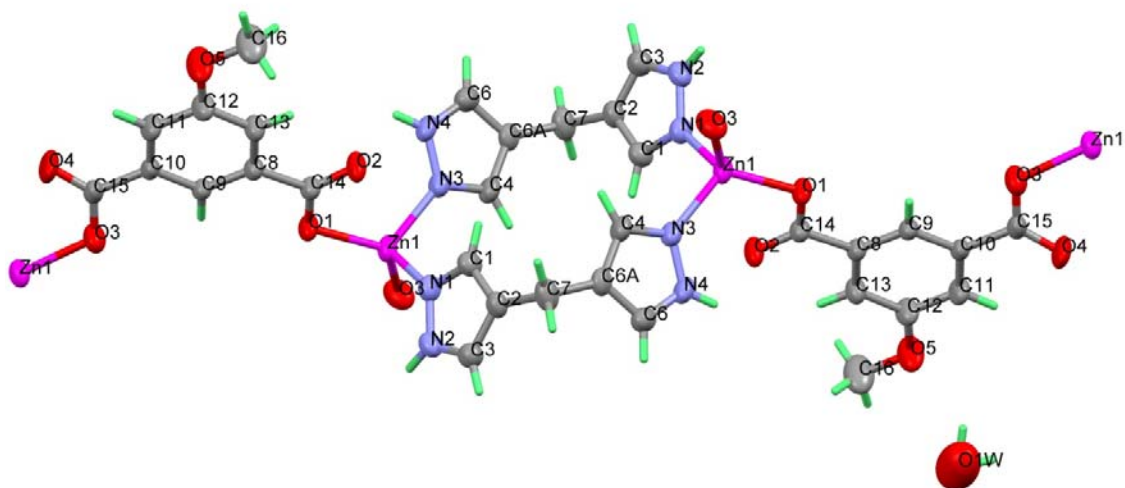

**Figure SI-3.** The coordination environment around the Zn(II) ion of compound **3**.

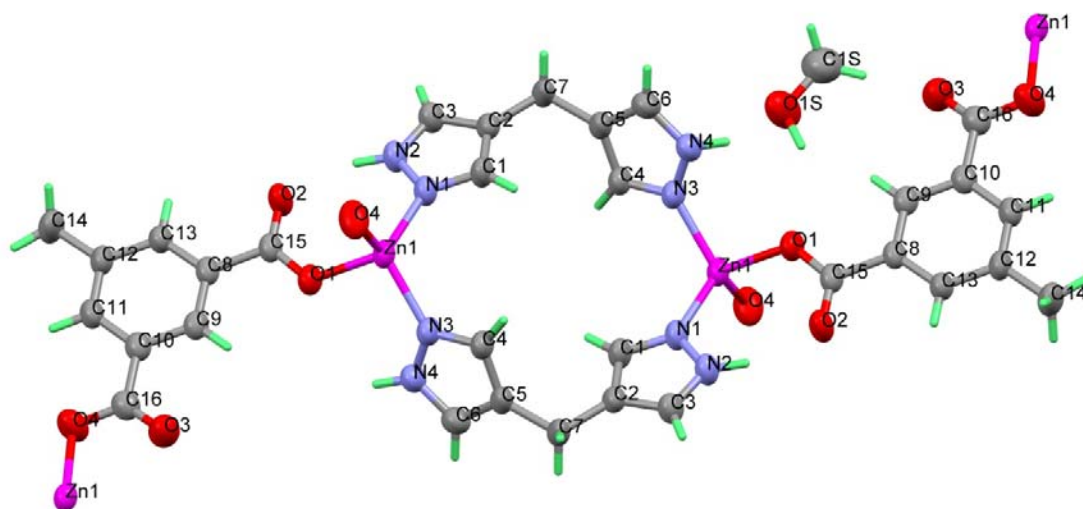

**Figure SI-4.** The coordination environment around the Zn(II) ion of compound **4**.

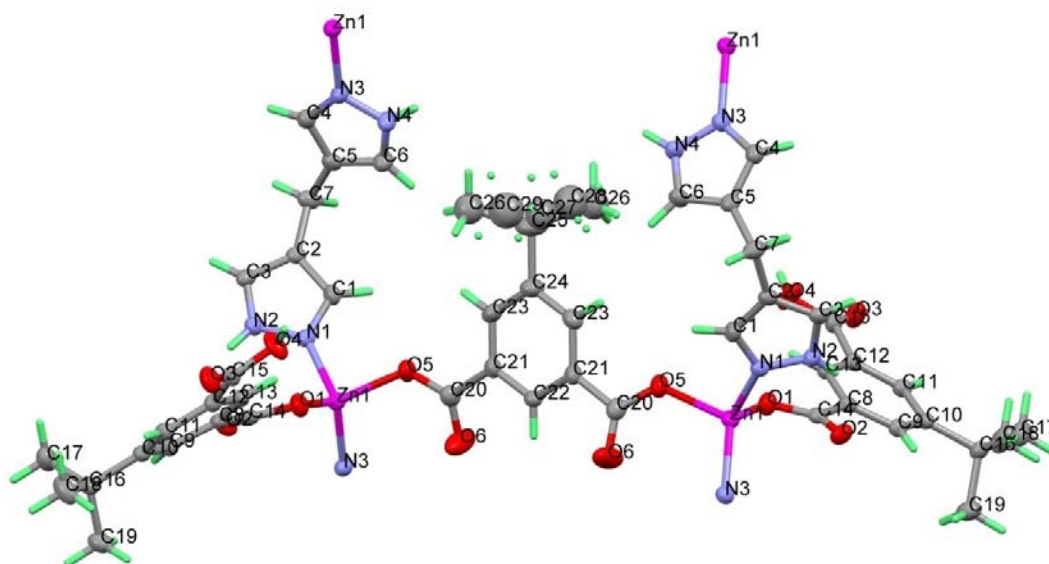

**Figure SI-5.** The coordination environment around the Zn(II) ion of compound **5**.

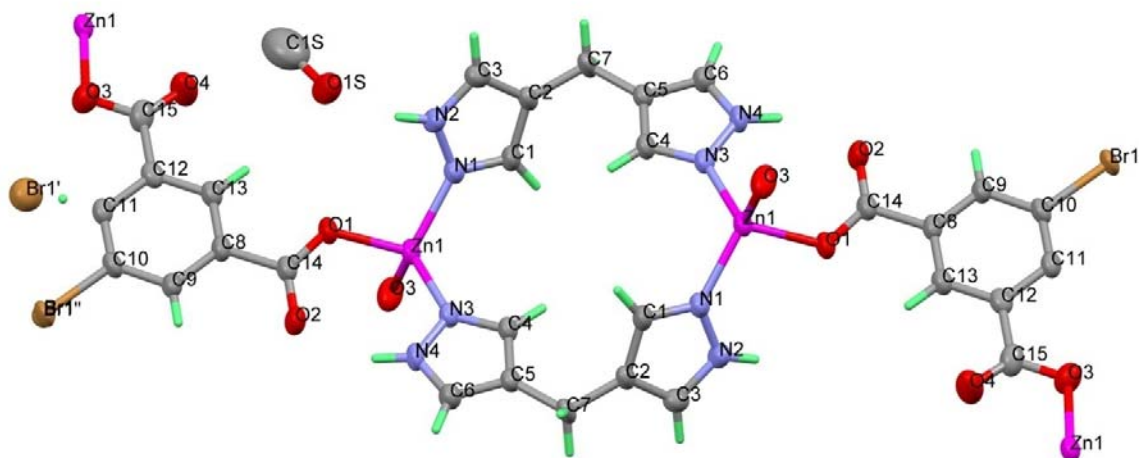

**Figure SI-6.** The coordination environment around the Zn(II) ion of compound **6**.

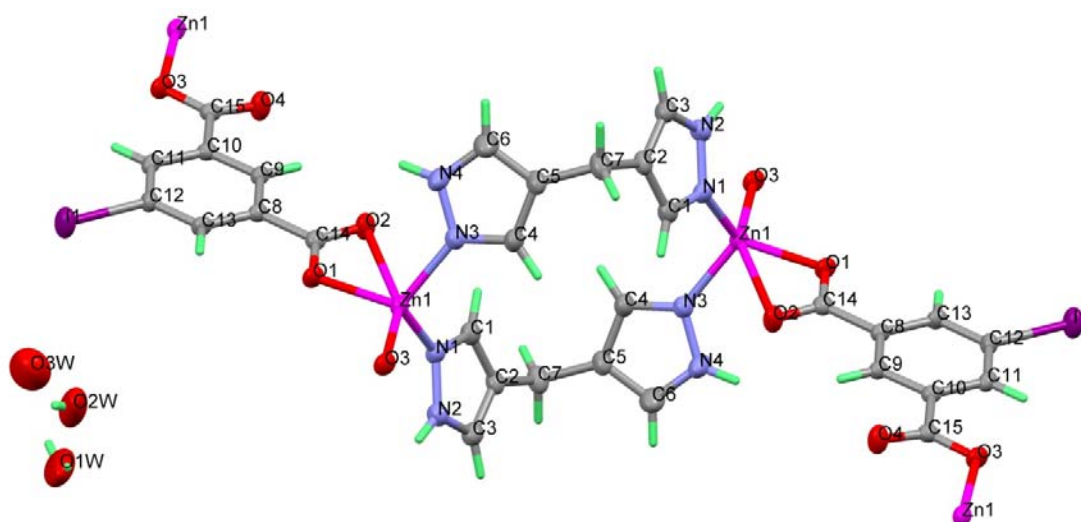

**Figure SI-7.** The coordination environment around the Zn(II) ion of compound **7**.

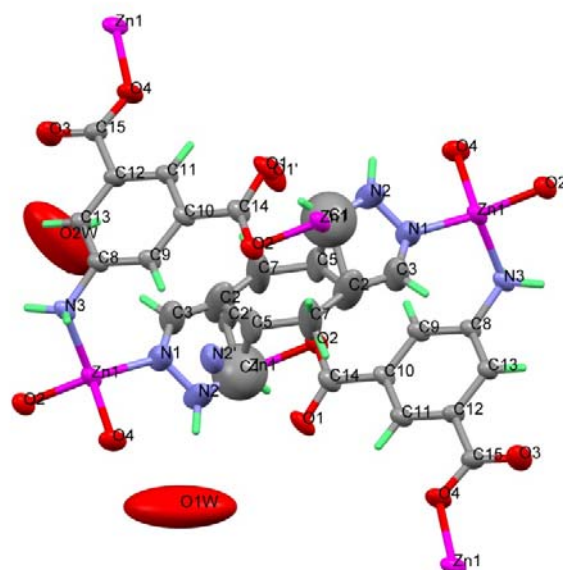

**Figure SI-8.** The coordination environment around the Zn(II) ion of compound **8**.

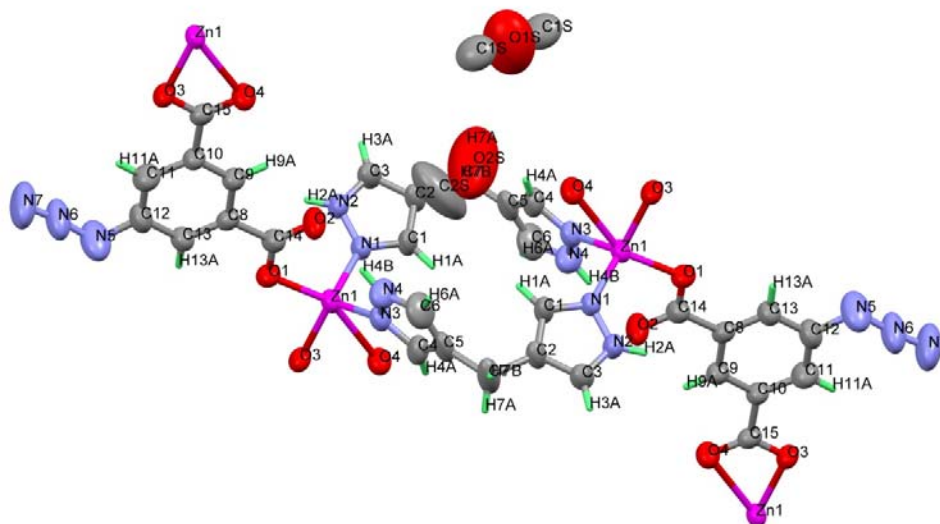

**Figure SI-9.** The coordination environment around the Zn(II) ion of compound **9**.

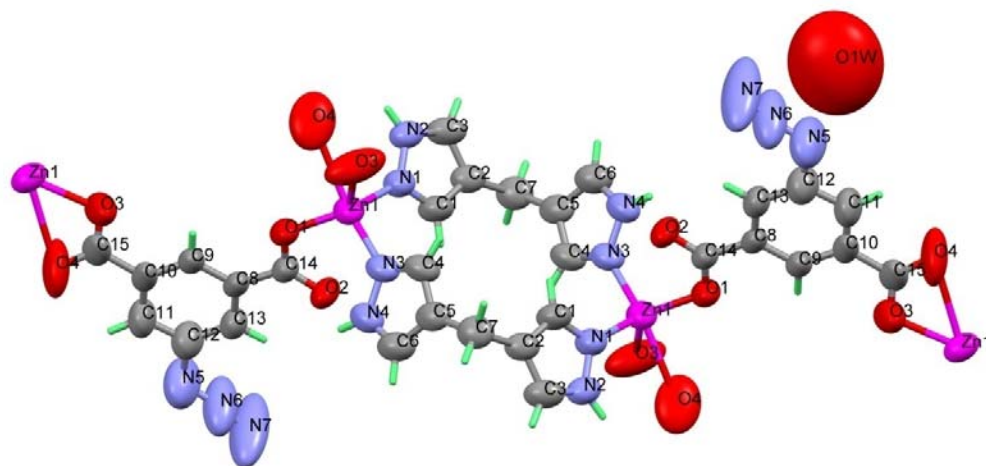

**Figure SI-10.** The coordination environment around the Zn(II) ion of compound **10**.

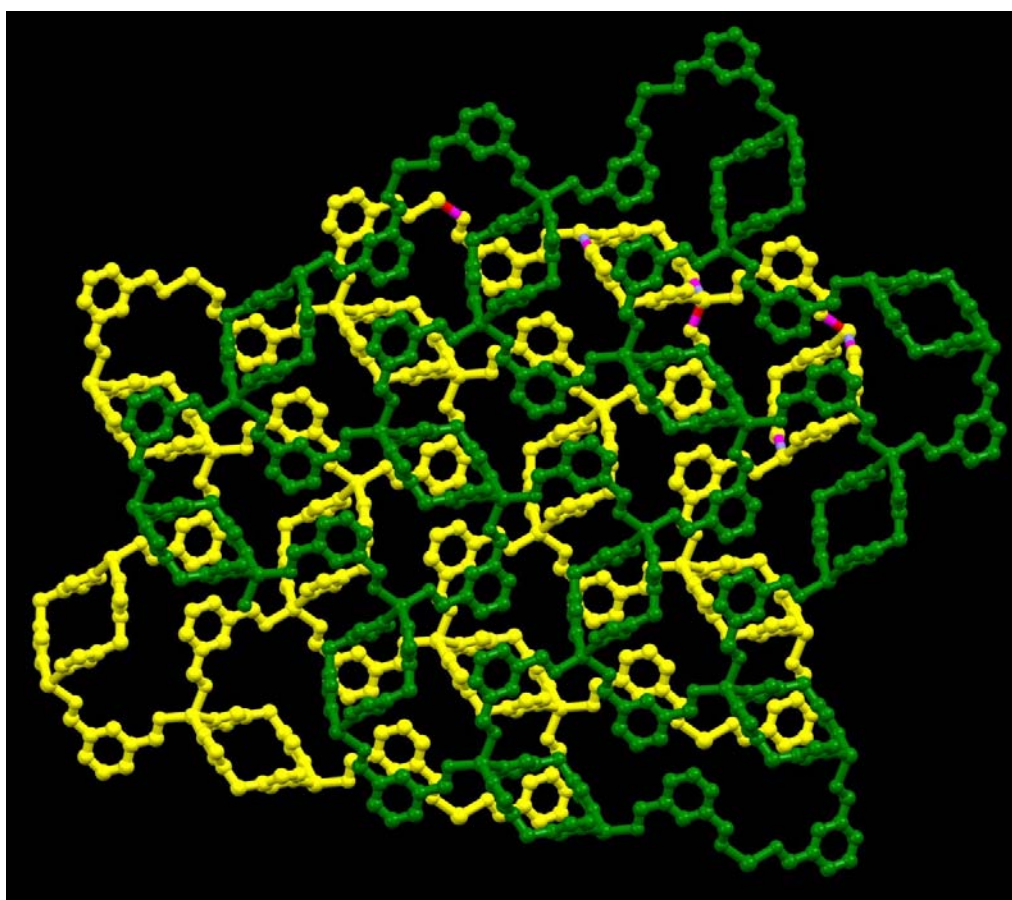

**Figure SI-11.** Crystal structure of **3** showing off-set stacking 2D grid networks.



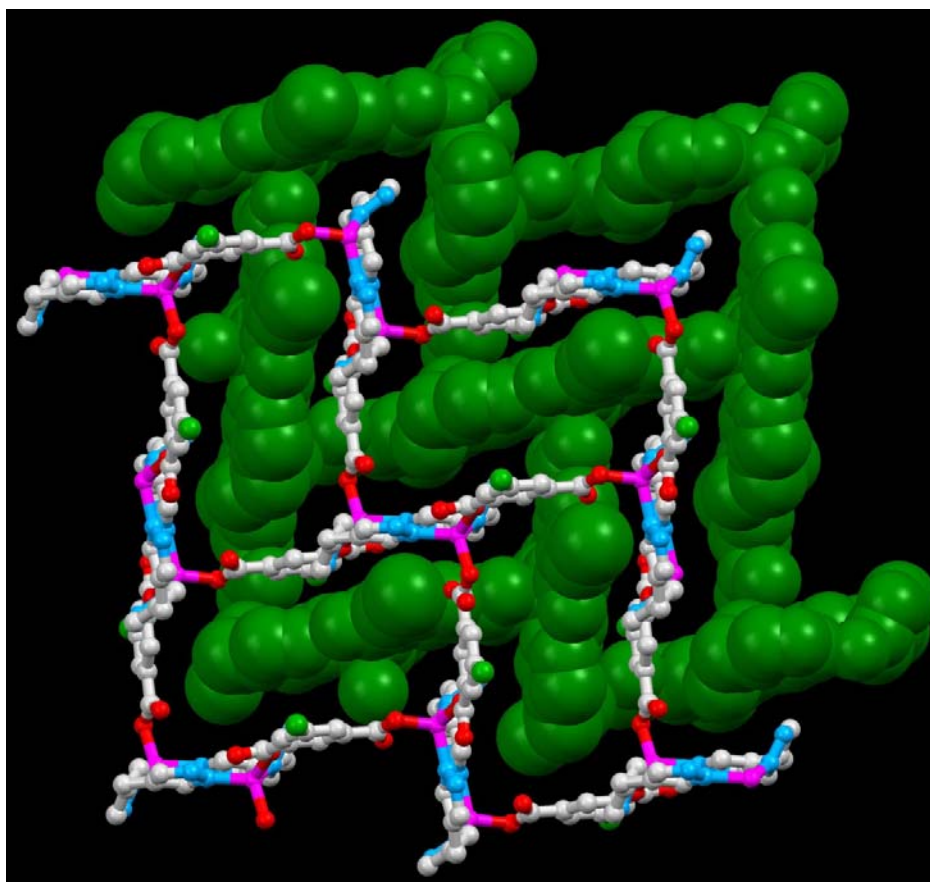

**Figure SI-12.** Crystal structure of **6** showing off-set stacking 2D grid networks.

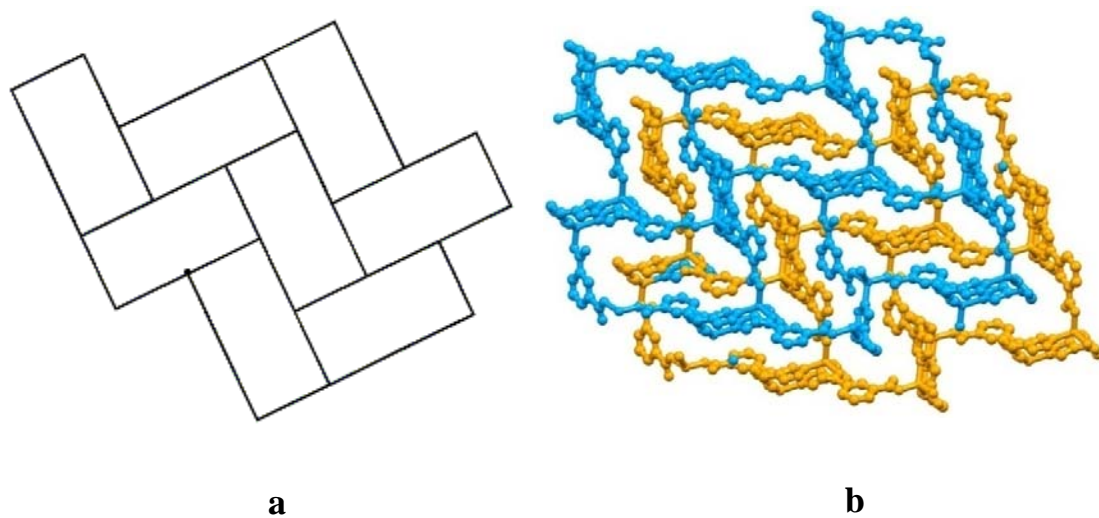

**Figure SI-13.** (a) Schematic diagram of 2D grid network and (b) off-set stacking of 2D grid networks of **1**.

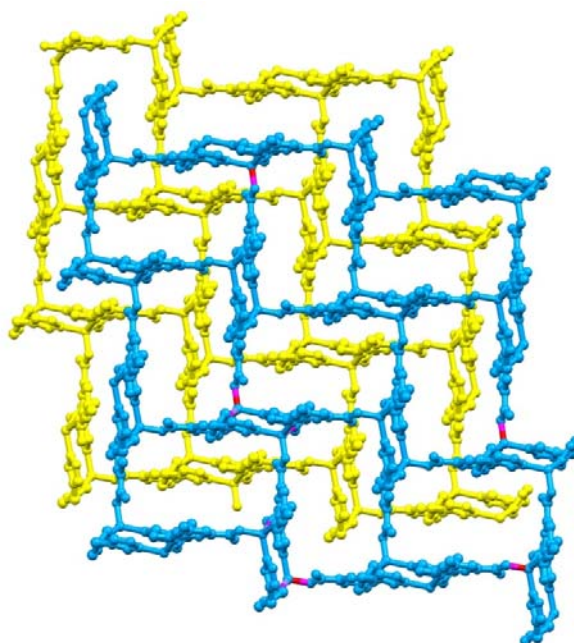

**Figure SI-14.** Off-set stackings of 2D networks of **4**.



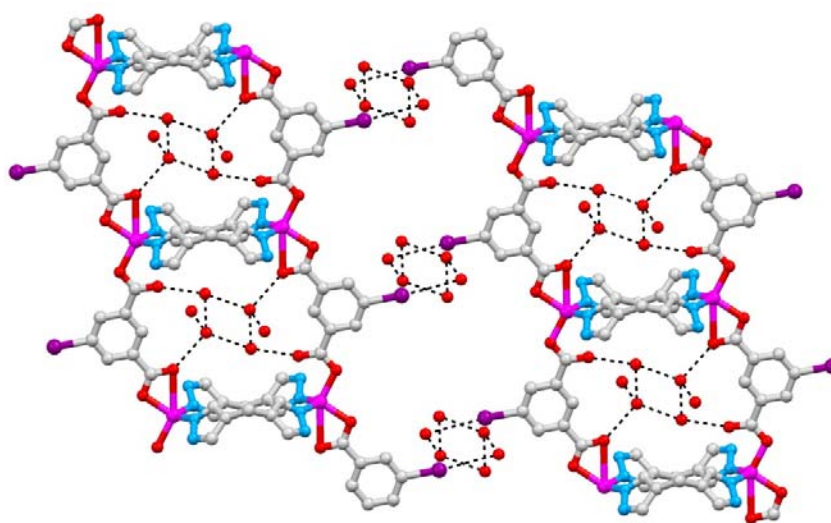

**Figure SI-15.** Crystal structure of **7** illustrating the role of water cluster in linking the adjacent 1D networks.

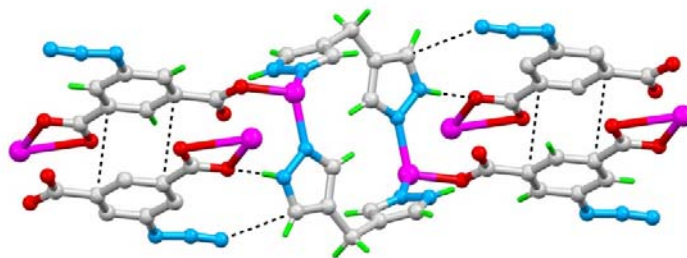

**a**

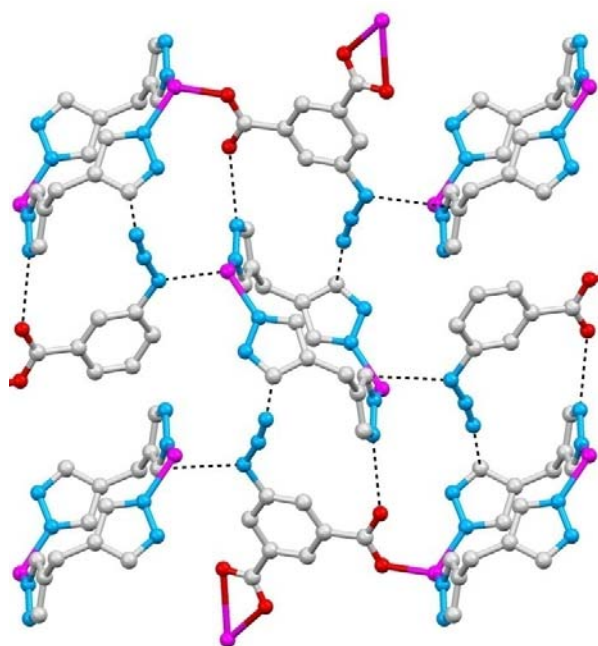

**b**

**Figure SI-16.** a) Crystal structure of **9** showing  $\pi$ - $\pi$  stacked self-assembly of SBU-I based 1D networks. (b) Crystal structure of **10** showing novel azide- $\pi$  interactions.

### Powder X-ray diffraction pattern

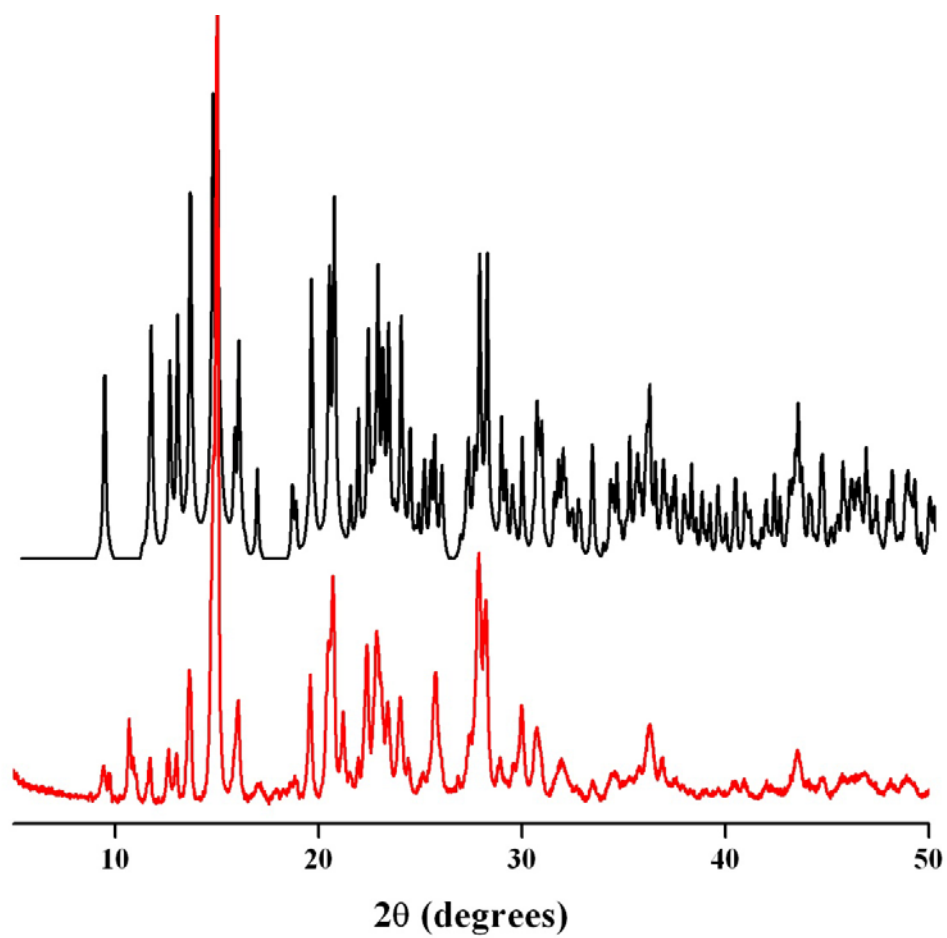

**Figure SI-17.** Powder XRD pattern of compound 1, simulated (black), experimental (red).

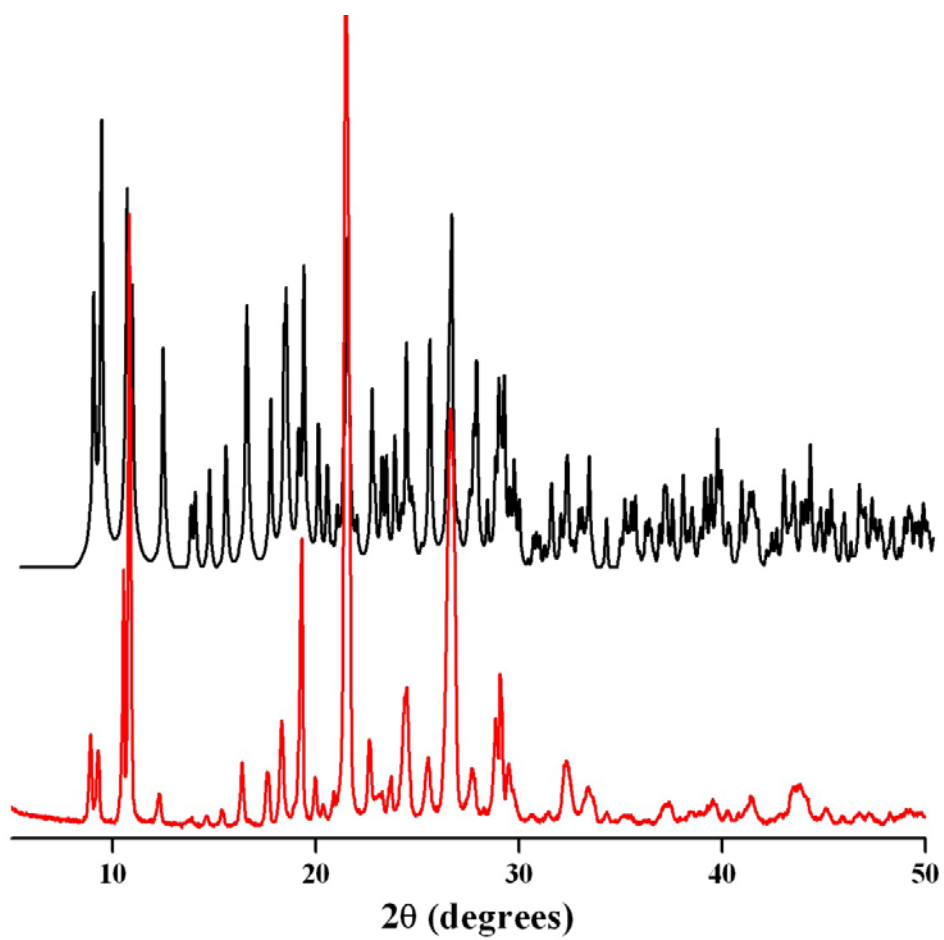

**Figure SI-18.** Powder XRD pattern of compound 2, simulated (black), experimental (red).

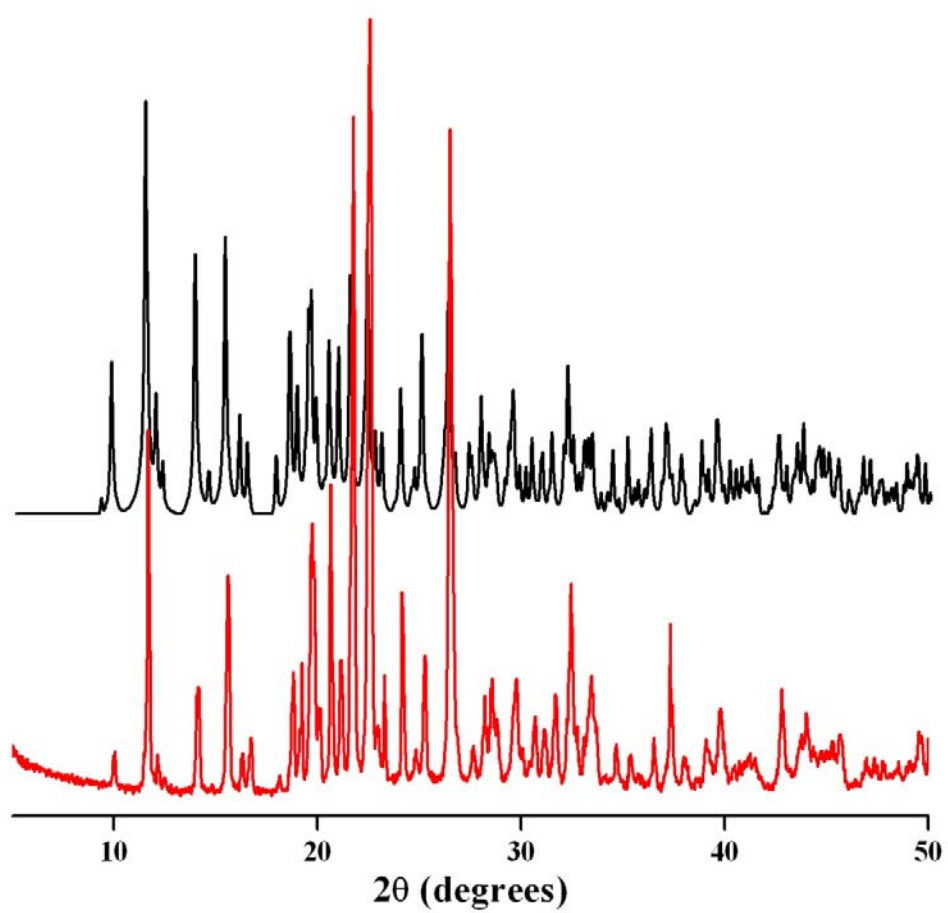

**Figure SI-19.** Powder XRD pattern of compound **3**, simulated (black), experimental (red).



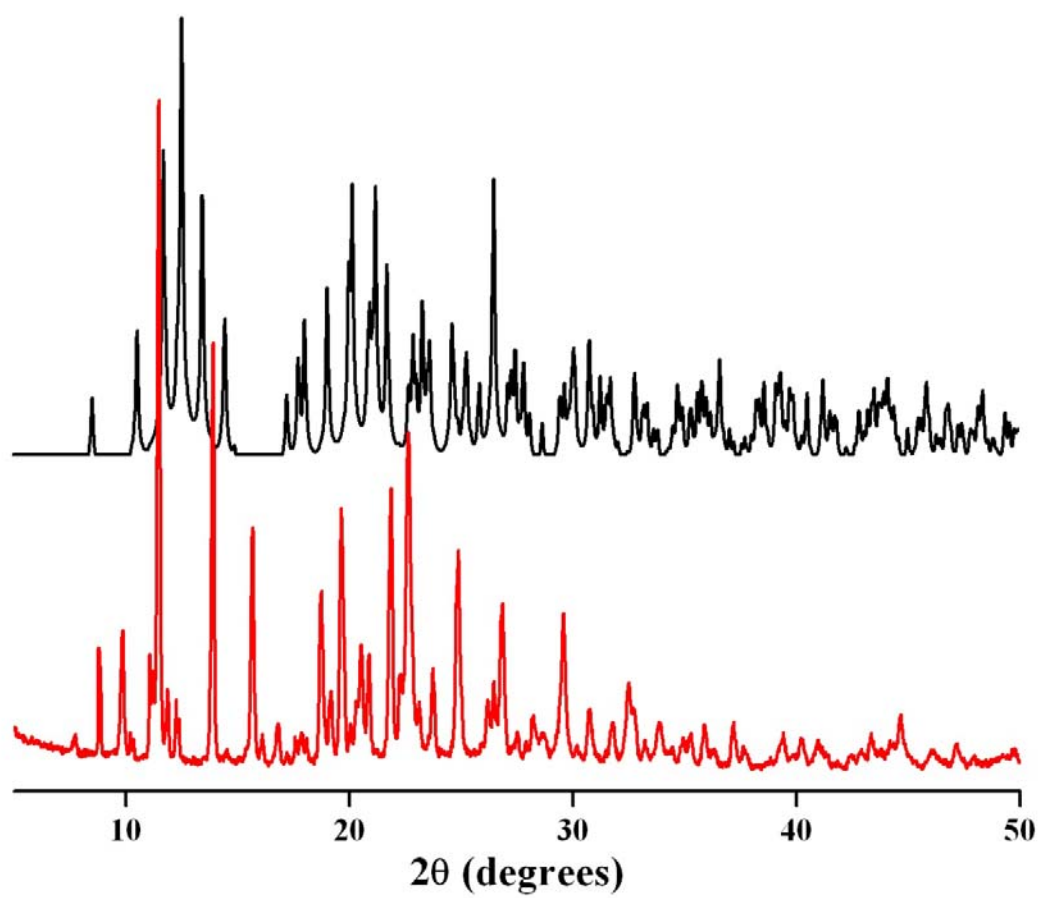

**Figure SI-20.** Powder XRD pattern of compound **4**, simulated (black), experimental (red).

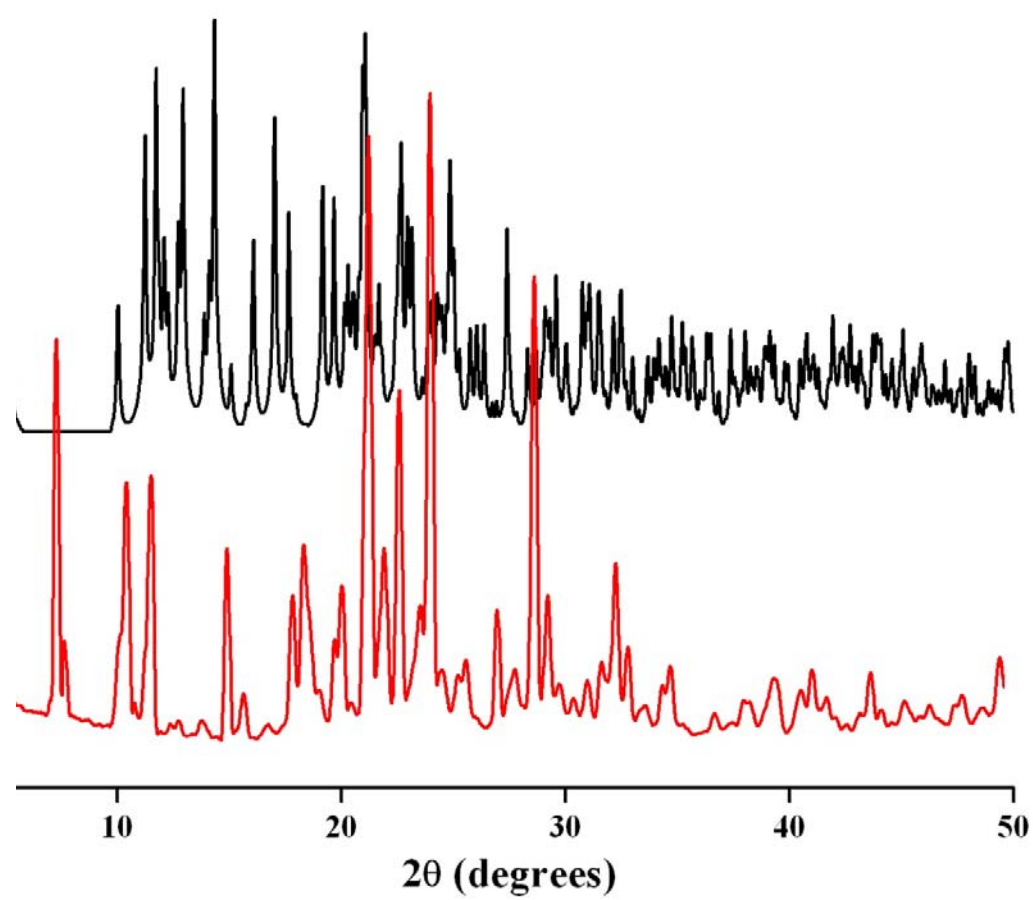

**Figure SI-21.** Powder XRD pattern of compound **5**, simulated (black), experimental (red).

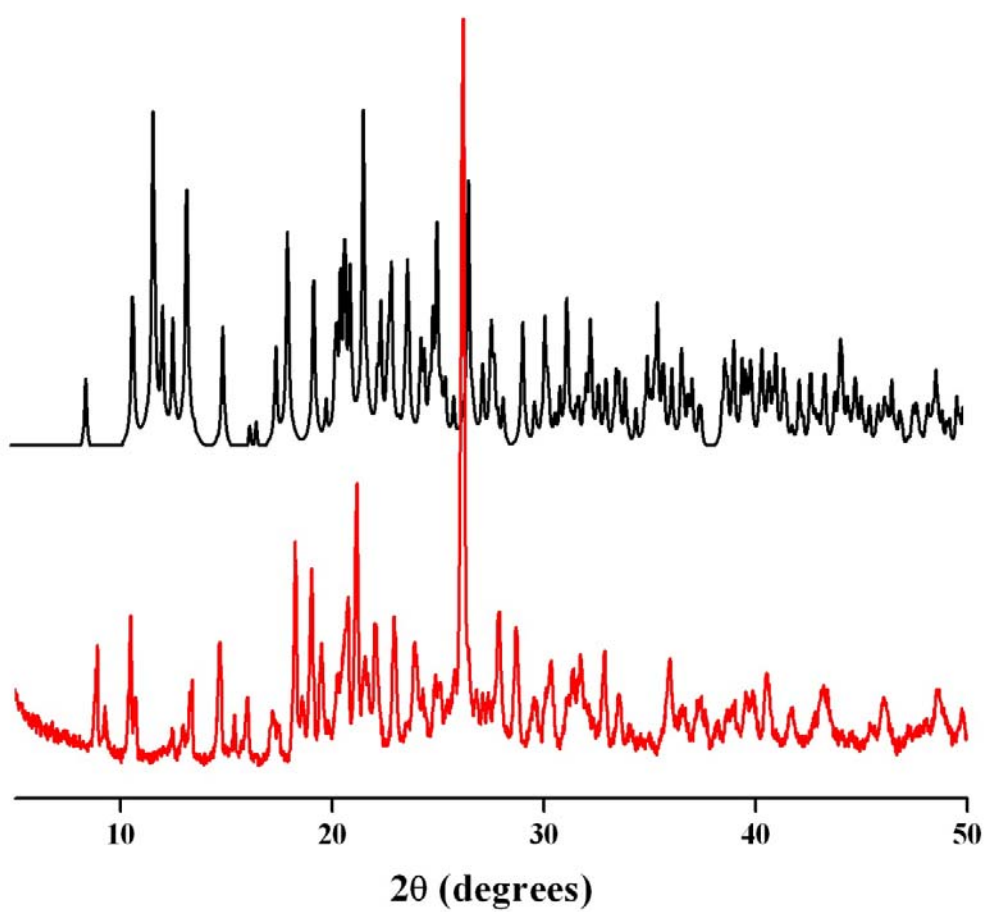

**Figure SI-22.** Powder XRD pattern of compound **6**, simulated (black), experimental (red).

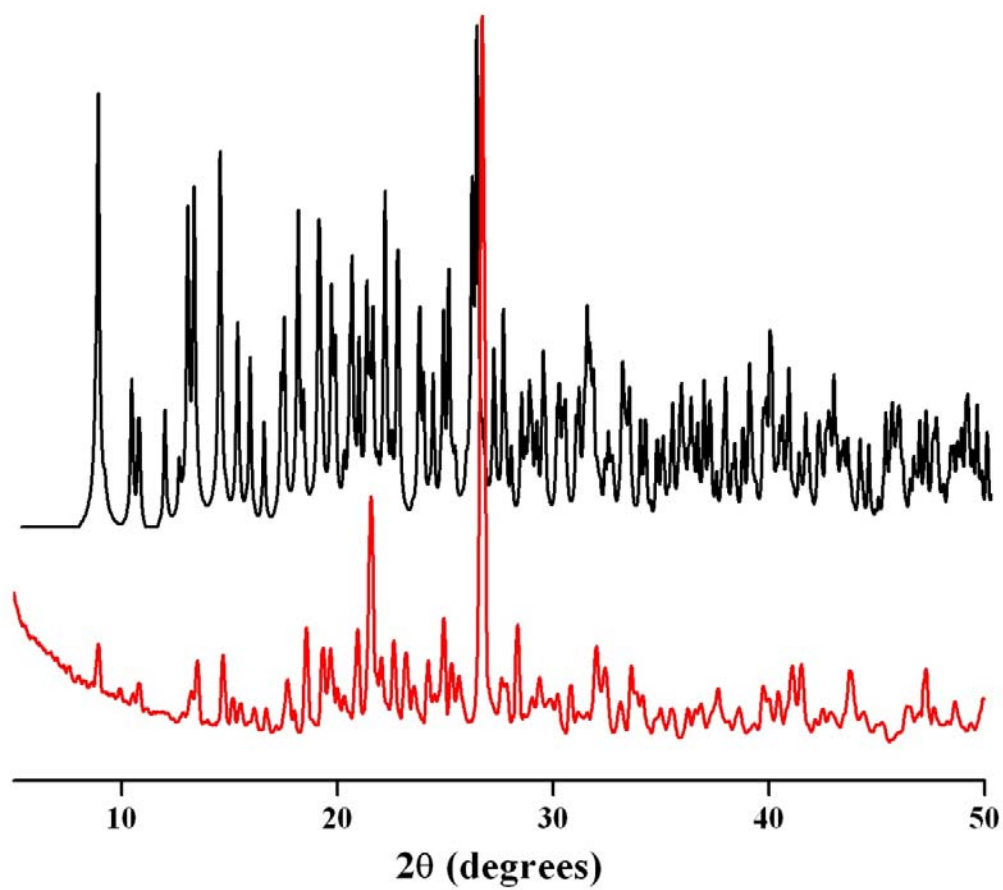

**Figure SI-23.** Powder XRD pattern of compound 7, simulated (black), experimental (red).

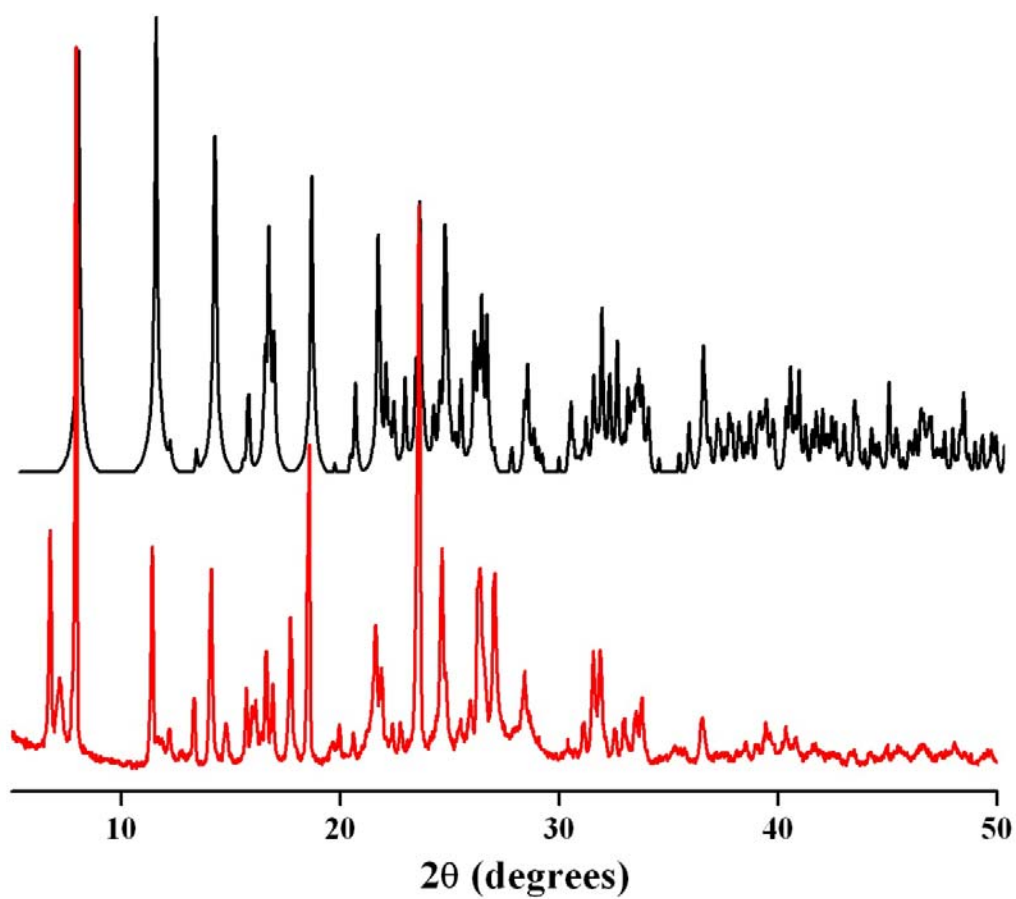

**Figure SI-24.** Powder XRD pattern of compound **8**, simulated (black), experimental (red).



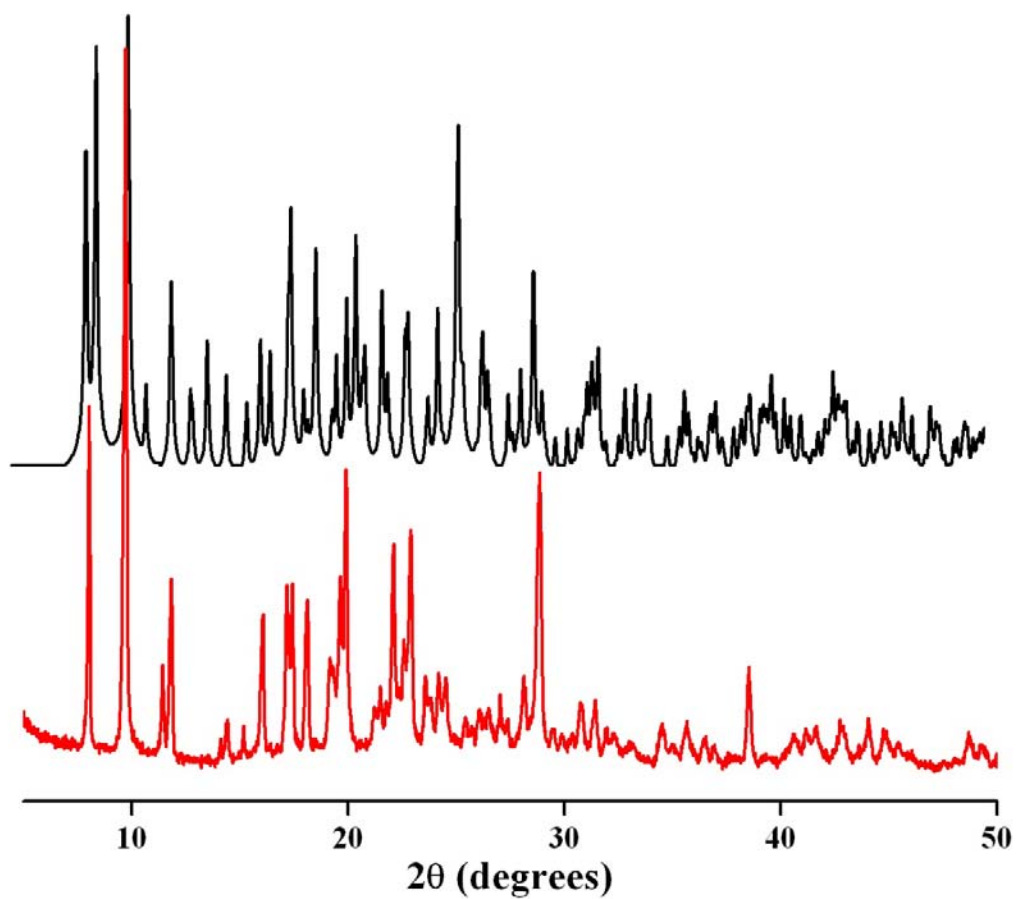

**Figure SI-25.** Powder XRD pattern of compound **9**, simulated (black), experimental (red).

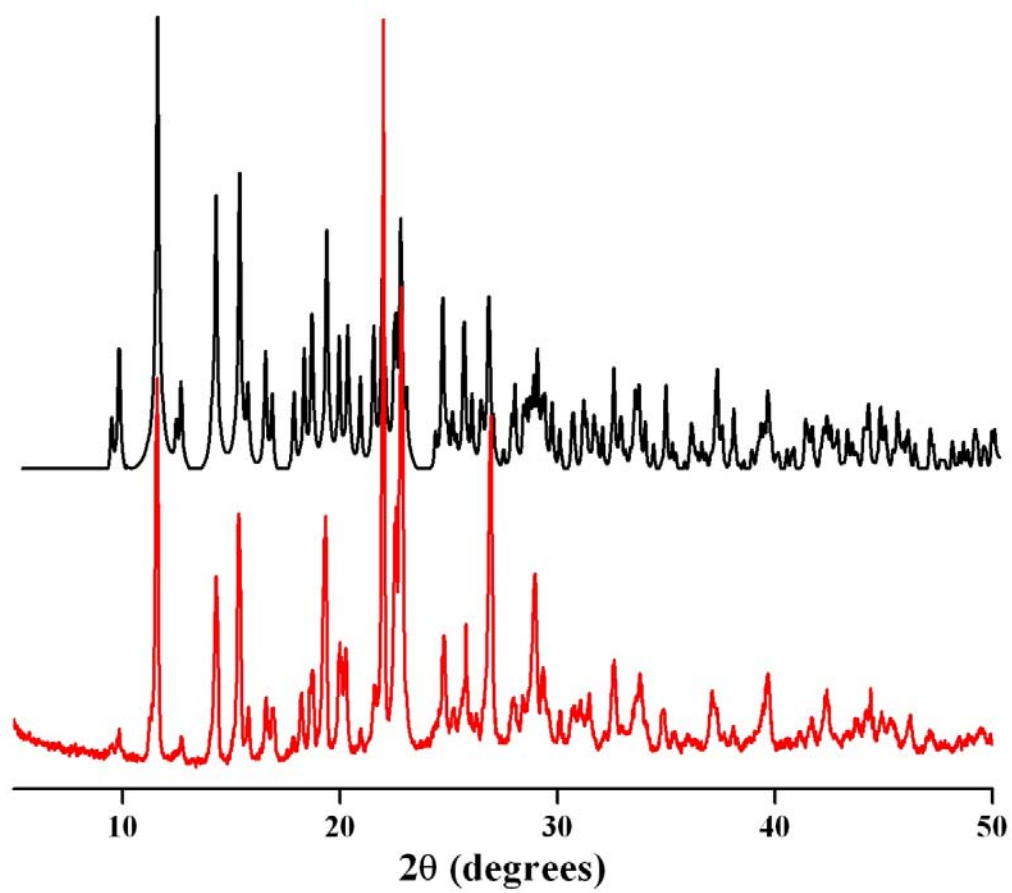

**Figure SI-26.** Powder XRD pattern of compound **10**, simulated (black), experimental (red).

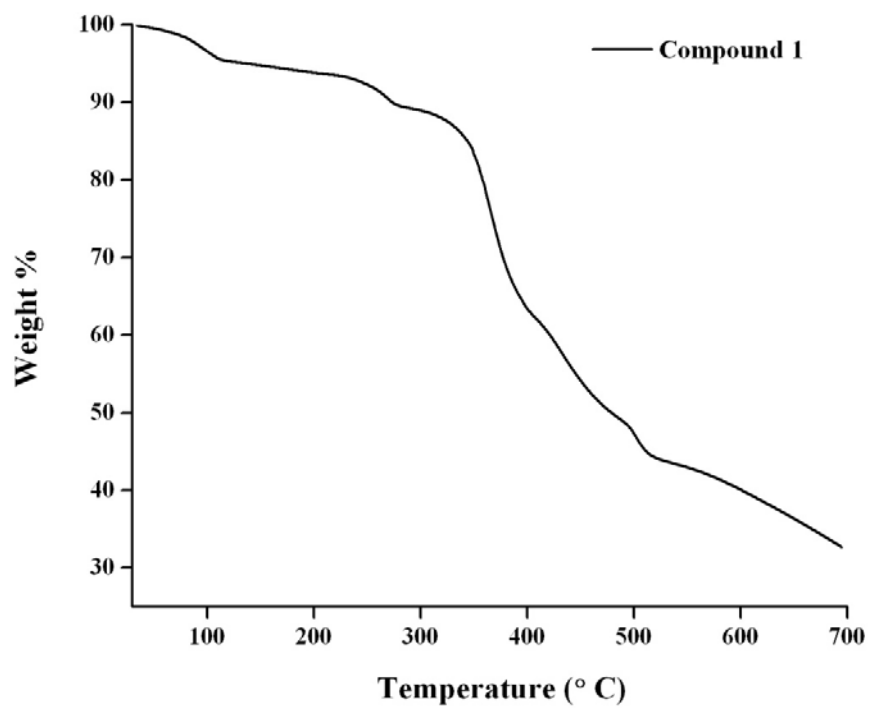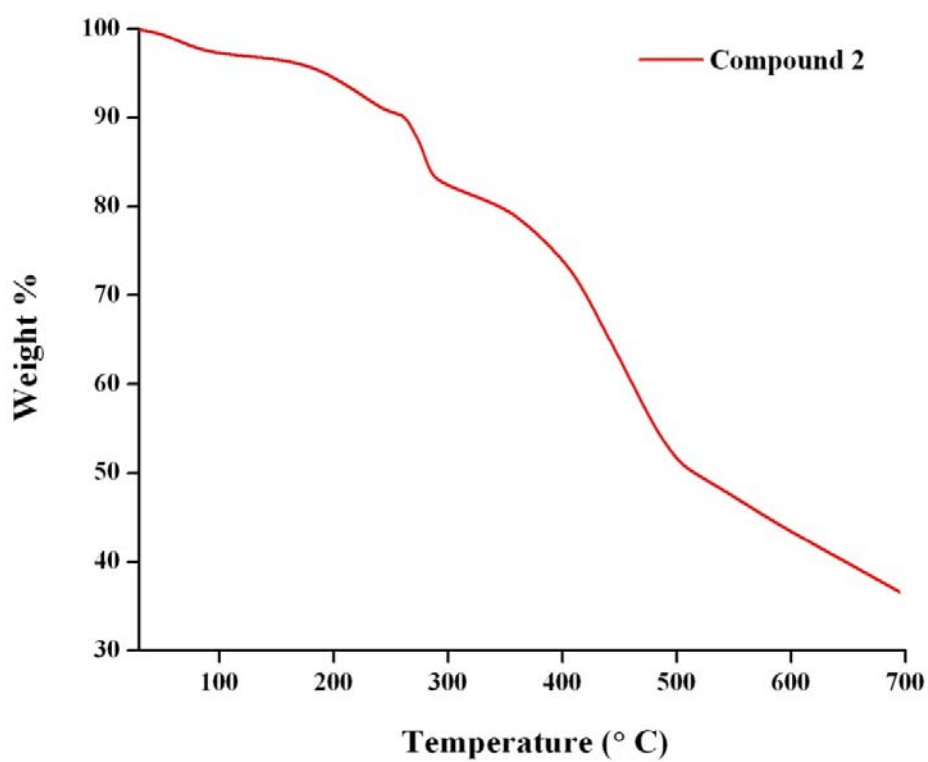

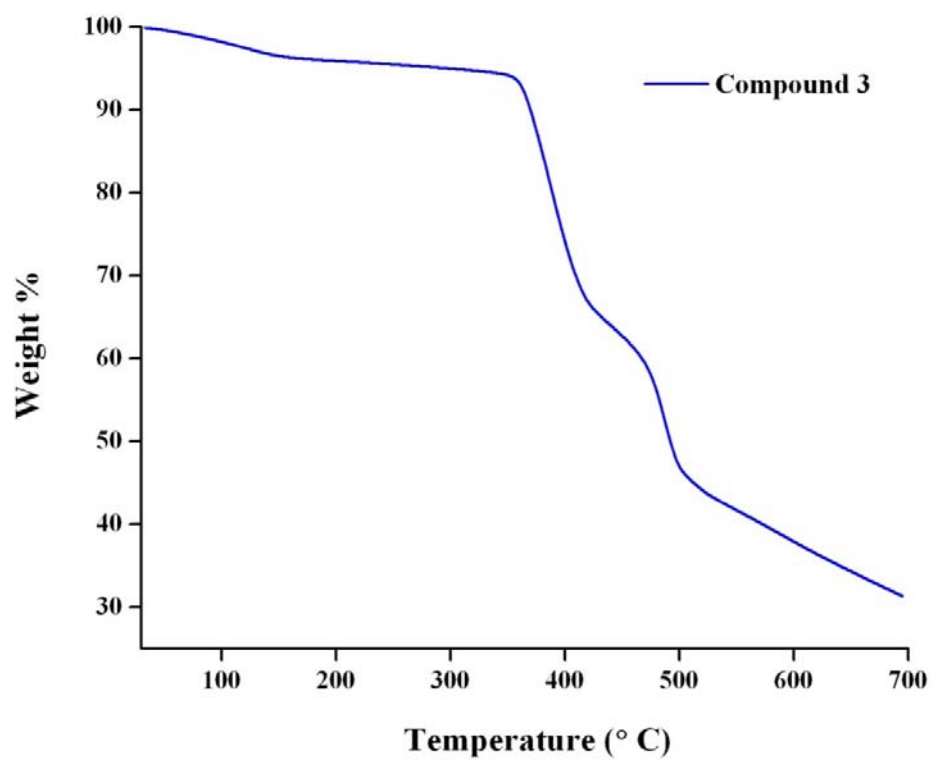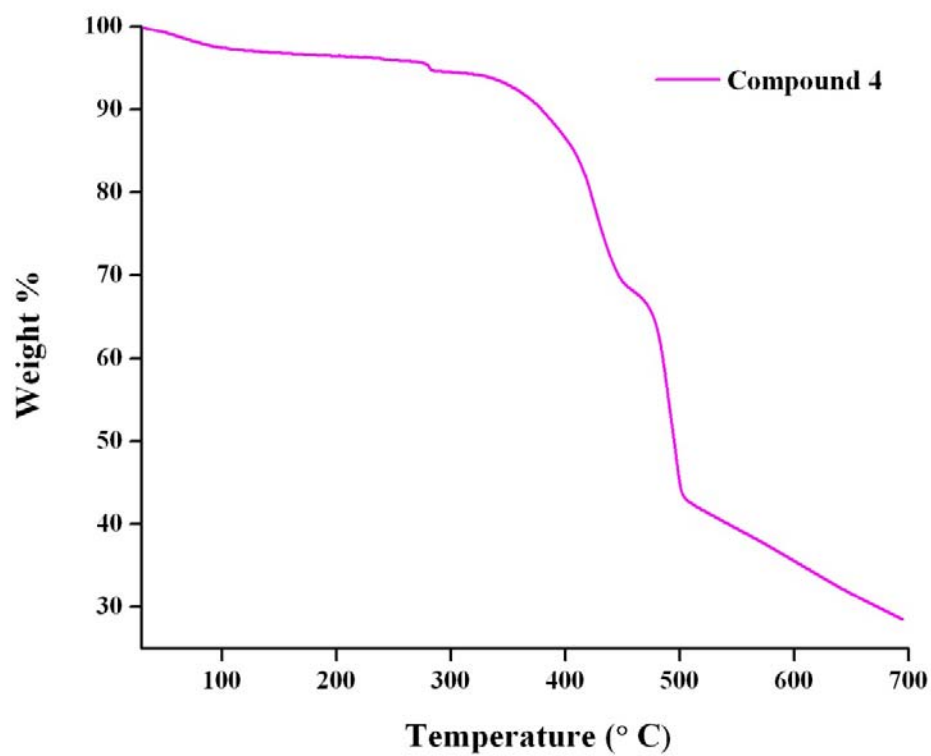

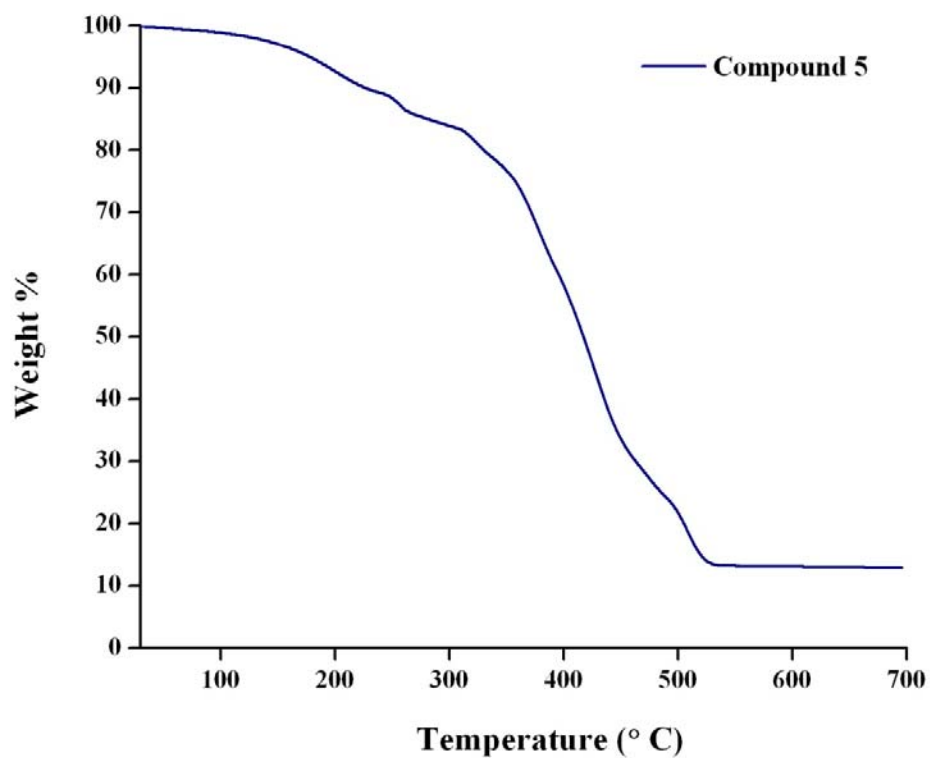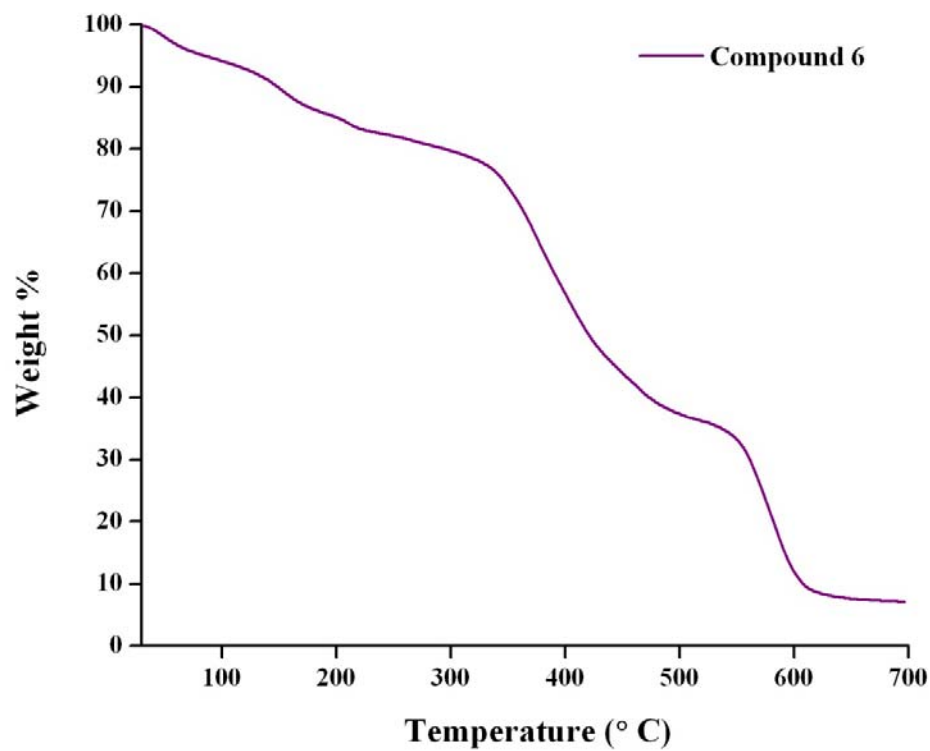



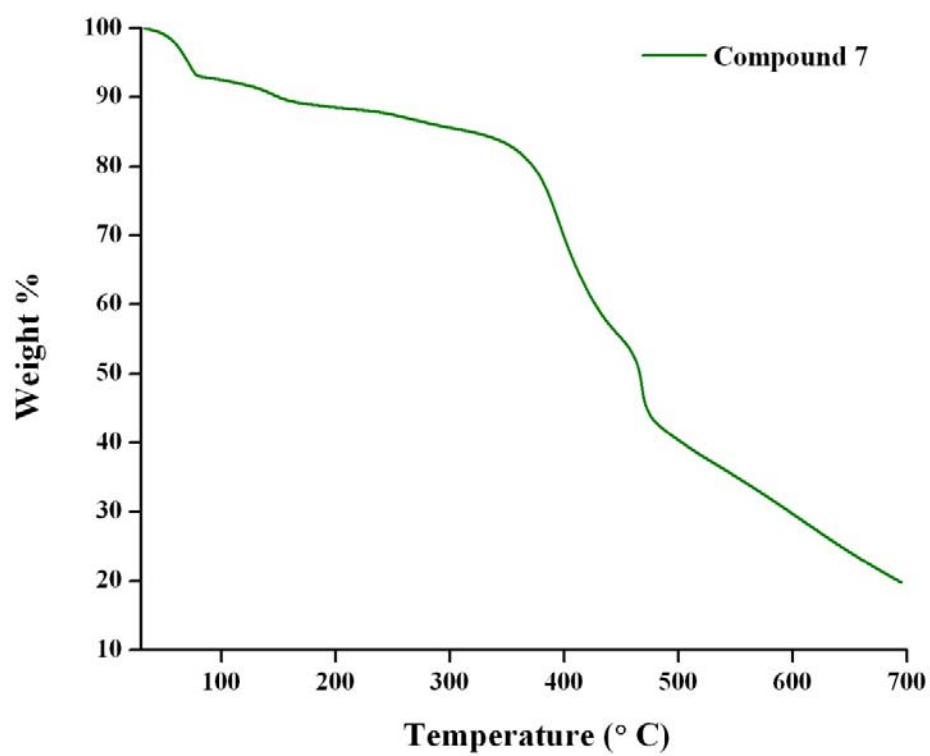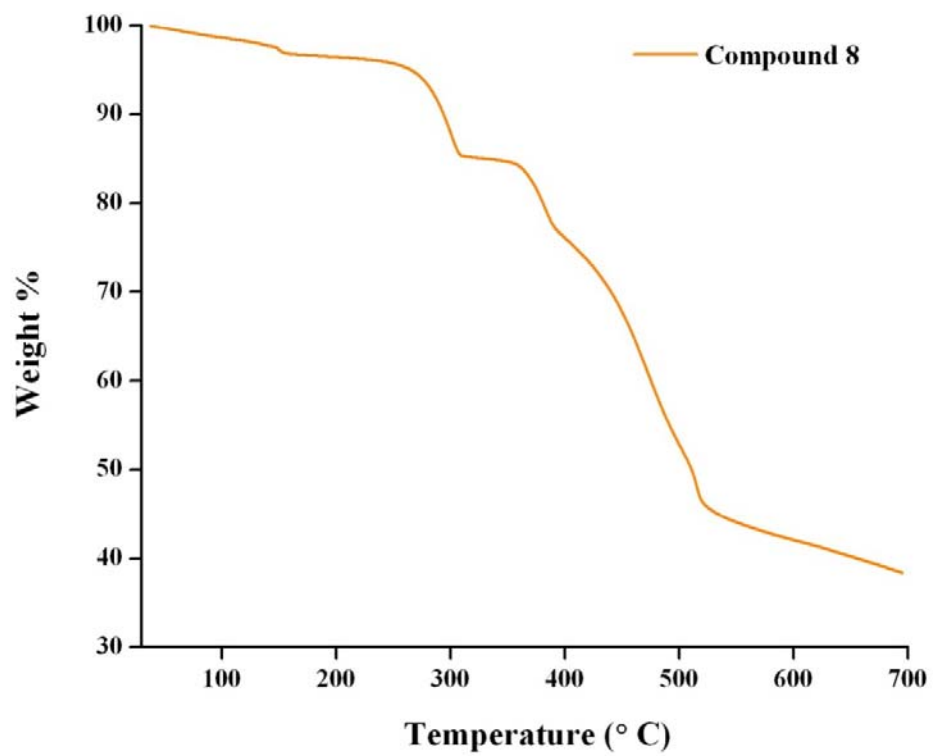

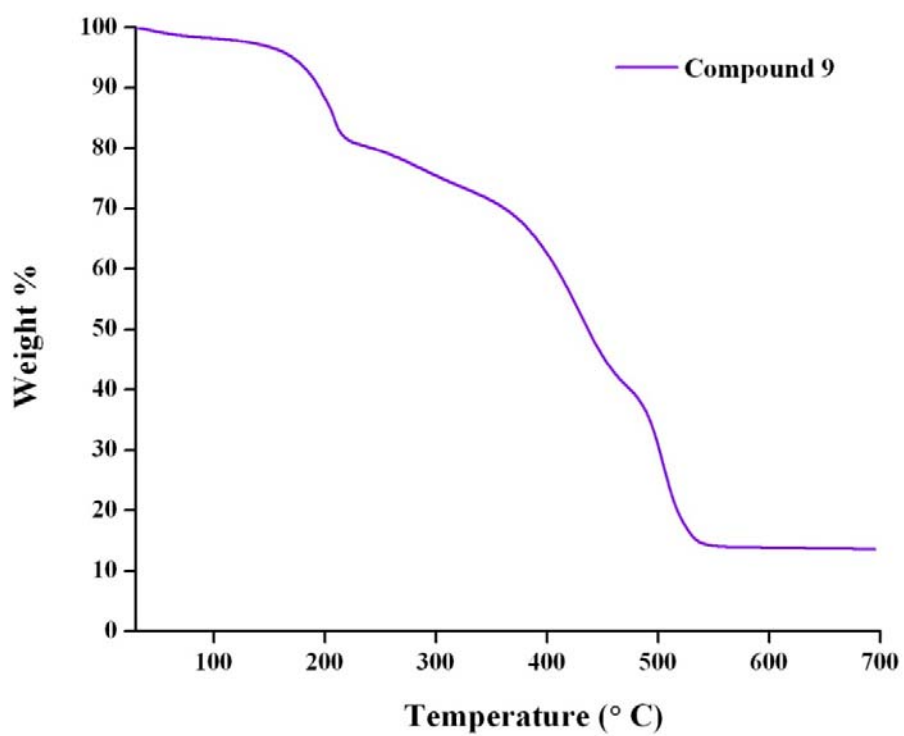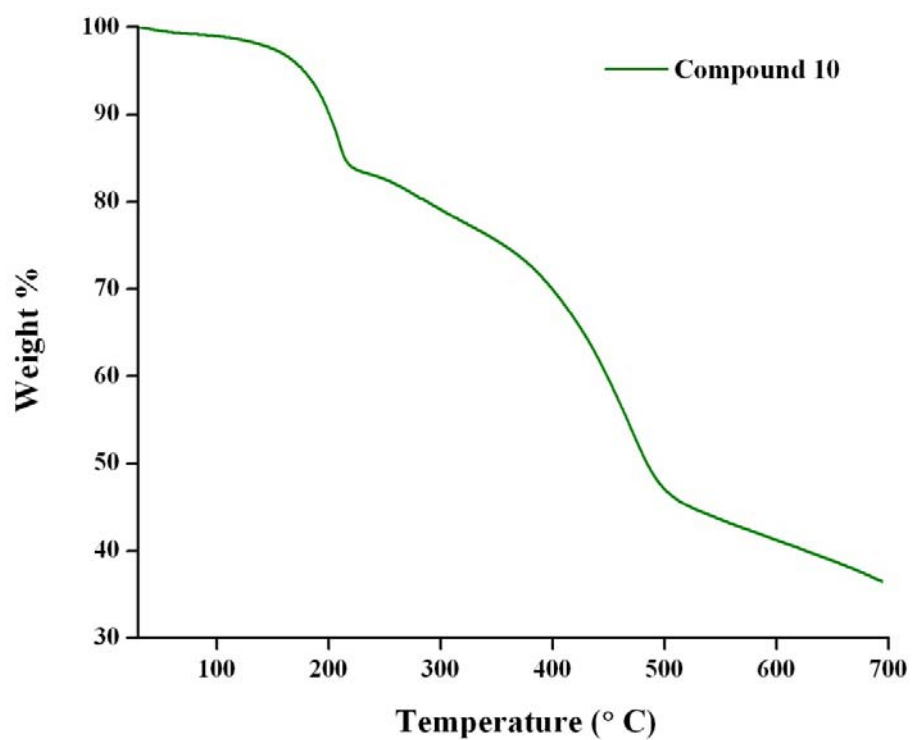

Figure SI-27. TGA plots of compound 1-10 (from top to bottom).

**Table SI-1:** Selected Bond Lengths (Å) and Angles (°) for Compounds **1-6**.

| <b>Compound 1</b>                |            |                                                   |            | <b>Compound 2</b>                               |            |                                                 |            |
|----------------------------------|------------|---------------------------------------------------|------------|-------------------------------------------------|------------|-------------------------------------------------|------------|
| Zn <sub>1</sub> -O <sub>1A</sub> | 1.959(3)   | O <sub>1A</sub> -Zn <sub>1</sub> -O <sub>1</sub>  | 104.17(13) | Zn <sub>1</sub> -O <sub>1</sub>                 | 1.976(2)   | N <sub>1</sub> -Zn <sub>1</sub> -N <sub>3</sub> | 107.05(13) |
| Zn <sub>1</sub> -O <sub>1</sub>  | 1.965(2)   | O <sub>1A</sub> -Zn <sub>1</sub> -N <sub>3A</sub> | 121.50(15) | Zn <sub>1</sub> -N <sub>1</sub>                 | 2.022(3)   | O <sub>1</sub> -Zn <sub>1</sub> -O <sub>3</sub> | 96.17(11)  |
| Zn <sub>1</sub> -N <sub>3A</sub> | 2.005(3)   | O <sub>1</sub> -Zn <sub>1</sub> -N <sub>3A</sub>  | 94.31(11)  | Zn <sub>1</sub> -N <sub>3</sub>                 | 2.037(3)   | N <sub>1</sub> -Zn <sub>1</sub> -O <sub>3</sub> | 118.99(13) |
| Zn <sub>1</sub> -N <sub>1</sub>  | 2.010(4)   | O <sub>1A</sub> -Zn <sub>1</sub> -N <sub>1</sub>  | 109.50(14) | Zn <sub>1</sub> -O <sub>3</sub>                 | 2.062(3)   | N <sub>3</sub> -Zn <sub>1</sub> -O <sub>3</sub> | 119.61(12) |
|                                  |            | O <sub>1</sub> -Zn <sub>1</sub> -N <sub>1</sub>   | 113.82(14) | Zn <sub>1</sub> -O <sub>4</sub>                 | 2.326(3)   | O <sub>1</sub> -Zn <sub>1</sub> -O <sub>4</sub> | 155.38(11) |
|                                  |            | N <sub>3A</sub> -Zn <sub>1</sub> -N <sub>1</sub>  | 112.39(14) | O <sub>1</sub> -Zn <sub>1</sub> -N <sub>1</sub> | 104.50(12) | N <sub>1</sub> -Zn <sub>1</sub> -O <sub>4</sub> | 89.75(12)  |
|                                  |            |                                                   |            | O <sub>1</sub> -Zn <sub>1</sub> -N <sub>3</sub> | 108.36(13) | N <sub>3</sub> -Zn <sub>1</sub> -O <sub>4</sub> | 85.78(12)  |
|                                  |            |                                                   |            |                                                 |            | O <sub>3</sub> -Zn <sub>1</sub> -O <sub>4</sub> | 59.22(10)  |
| <b>Compound 3</b>                |            |                                                   |            | <b>Compound 4</b>                               |            |                                                 |            |
| Zn <sub>1</sub> -O <sub>1</sub>  | 1.9603(9)  | O <sub>1</sub> -Zn <sub>1</sub> -O <sub>3</sub>   | 117.98(5)  | Zn <sub>1</sub> -O <sub>4</sub>                 | 1.9380(16) | O <sub>4</sub> -Zn <sub>1</sub> -O <sub>1</sub> | 101.19(7)  |
| Zn <sub>1</sub> -O <sub>3</sub>  | 1.9637(11) | O <sub>1</sub> -Zn <sub>1</sub> -N <sub>1</sub>   | 112.53(5)  | Zn <sub>1</sub> -O <sub>1</sub>                 | 1.9475(15) | O <sub>4</sub> -Zn <sub>1</sub> -N <sub>3</sub> | 121.39(8)  |
| Zn <sub>1</sub> -N <sub>1</sub>  | 2.0143(14) | O <sub>3</sub> -Zn <sub>1</sub> -N <sub>1</sub>   | 107.68(5)  | Zn <sub>1</sub> -N <sub>3</sub>                 | 2.0037(18) | O <sub>1</sub> -Zn <sub>1</sub> -N <sub>3</sub> | 99.29(7)   |
| Zn <sub>1</sub> -N <sub>3</sub>  | 2.0269(13) | O <sub>1</sub> -Zn <sub>1</sub> -N <sub>3</sub>   | 117.02(5)  | Zn <sub>1</sub> -N <sub>1</sub>                 | 2.0130(17) | O <sub>4</sub> -Zn <sub>1</sub> -N <sub>1</sub> | 109.71(8)  |
|                                  |            | O <sub>3</sub> -Zn <sub>1</sub> -N <sub>3</sub>   | 91.93(5)   |                                                 |            | O <sub>1</sub> -Zn <sub>1</sub> -N <sub>1</sub> | 111.54(7)  |
|                                  |            | N <sub>1</sub> -Zn <sub>1</sub> -N <sub>3</sub>   | 107.59(5)  |                                                 |            | N <sub>3</sub> -Zn <sub>1</sub> -N <sub>1</sub> | 112.36(7)  |
| <b>Compound 6</b>                |            |                                                   |            | <b>Compound 5</b>                               |            |                                                 |            |
| Zn <sub>1</sub> -O <sub>3</sub>  | 1.951(3)   | O <sub>3</sub> -Zn <sub>1</sub> -O <sub>1</sub>   | 99.07(13)  | Zn <sub>1</sub> -O <sub>5</sub>                 | 1.955(2)   | O <sub>5</sub> -Zn <sub>1</sub> -O <sub>1</sub> | 103.34(10) |
| Zn <sub>1</sub> -O <sub>1</sub>  | 1.954(3)   | O <sub>3</sub> -Zn <sub>1</sub> -N <sub>1</sub>   | 121.82(16) | Zn <sub>1</sub> -O <sub>1</sub>                 | 1.958(2)   | O <sub>5</sub> -Zn <sub>1</sub> -N <sub>1</sub> | 98.59(10)  |
| Zn <sub>1</sub> -N <sub>1</sub>  | 1.992(4)   | O <sub>1</sub> -Zn <sub>1</sub> -N <sub>1</sub>   | 103.09(15) | Zn <sub>1</sub> -N <sub>1</sub>                 | 2.008(3)   | O <sub>1</sub> -Zn <sub>1</sub> -N <sub>1</sub> | 107.51(10) |
| Zn <sub>1</sub> -N <sub>3</sub>  | 2.003(3)   | O <sub>3</sub> -Zn <sub>1</sub> -N <sub>3</sub>   | 106.84(15) | Zn <sub>1</sub> -N <sub>3</sub>                 | 2.008(3)   | O <sub>5</sub> -Zn <sub>1</sub> -N <sub>3</sub> | 112.07(11) |
|                                  |            | O <sub>1</sub> -Zn <sub>1</sub> -N <sub>3</sub>   | 111.47(13) |                                                 |            | O <sub>1</sub> -Zn <sub>1</sub> -N <sub>3</sub> | 120.25(10) |
|                                  |            | N <sub>1</sub> -Zn <sub>1</sub> -N <sub>3</sub>   | 113.39(14) |                                                 |            | N <sub>1</sub> -Zn <sub>1</sub> -N <sub>3</sub> | 112.58(11) |

| <b>Table SI-2:</b> Selected Bond Lengths (Å) and Angles (°) for Compounds <b>7-10</b> . |          |                                                 |            |                                 |            |                                                 |            |
|-----------------------------------------------------------------------------------------|----------|-------------------------------------------------|------------|---------------------------------|------------|-------------------------------------------------|------------|
| <b>Compound 7</b>                                                                       |          |                                                 |            | <b>Compound 8</b>               |            |                                                 |            |
| Zn <sub>1</sub> -O <sub>3</sub>                                                         | 1.976(3) | O <sub>3</sub> -Zn <sub>1</sub> -N <sub>1</sub> | 108.29(12) | Zn <sub>1</sub> -O <sub>4</sub> | 1.939(2)   | O <sub>4</sub> -Zn <sub>1</sub> -O <sub>2</sub> | 101.63(8)  |
| Zn <sub>1</sub> -N <sub>1</sub>                                                         | 2.008(3) | O <sub>3</sub> -Zn <sub>1</sub> -O <sub>1</sub> | 96.64(11)  | Zn <sub>1</sub> -O <sub>2</sub> | 1.9779(17) | O <sub>4</sub> -Zn <sub>1</sub> -N <sub>1</sub> | 103.26(11) |
| Zn <sub>1</sub> -O <sub>1</sub>                                                         | 2.011(3) | N <sub>1</sub> -Zn <sub>1</sub> -O <sub>1</sub> | 117.28(12) | Zn <sub>1</sub> -N <sub>1</sub> | 2.002(3)   | O <sub>2</sub> -Zn <sub>1</sub> -N <sub>1</sub> | 124.25(12) |
| Zn <sub>1</sub> -N <sub>3</sub>                                                         | 2.014(3) | O <sub>3</sub> -Zn <sub>1</sub> -N <sub>3</sub> | 109.31(12) | Zn <sub>1</sub> -N <sub>3</sub> | 2.067(2)   | O <sub>4</sub> -Zn <sub>1</sub> -N <sub>3</sub> | 114.37(10) |
|                                                                                         |          | N <sub>1</sub> -Zn <sub>1</sub> -N <sub>3</sub> | 111.96(13) |                                 |            | O <sub>2</sub> -Zn <sub>1</sub> -N <sub>3</sub> | 103.38(9)  |
|                                                                                         |          | O <sub>1</sub> -Zn <sub>1</sub> -N <sub>3</sub> | 112.02(12) |                                 |            | N <sub>1</sub> -Zn <sub>1</sub> -N <sub>3</sub> | 110.12(11) |
| <b>Compound 9</b>                                                                       |          |                                                 |            | <b>Compound 10</b>              |            |                                                 |            |
| Zn <sub>1</sub> -O <sub>1</sub>                                                         | 1.973(3) | O <sub>1</sub> -Zn <sub>1</sub> -N <sub>1</sub> | 107.78(13) |                                 |            |                                                 |            |
| Zn <sub>1</sub> -N <sub>1</sub>                                                         | 2.012(3) | O <sub>1</sub> -Zn <sub>1</sub> -O <sub>3</sub> | 95.29(11)  |                                 |            |                                                 |            |
| Zn <sub>1</sub> -O <sub>3</sub>                                                         | 2.027(3) | N <sub>1</sub> -Zn <sub>1</sub> -O <sub>3</sub> | 118.11(13) | Zn <sub>1</sub> -O <sub>1</sub> | 1.945(4)   | O <sub>1</sub> -Zn <sub>1</sub> -N <sub>3</sub> | 110.68(19) |
| Zn <sub>1</sub> -N <sub>3</sub>                                                         | 2.035(3) | O <sub>1</sub> -Zn <sub>1</sub> -N <sub>3</sub> | 112.09(13) | Zn <sub>1</sub> -N <sub>3</sub> | 1.998(5)   | O <sub>1</sub> -Zn <sub>1</sub> -N <sub>1</sub> | 114.2(2)   |
|                                                                                         |          | N <sub>1</sub> -Zn <sub>1</sub> -N <sub>3</sub> | 107.49(13) | Zn <sub>1</sub> -N <sub>1</sub> | 2.006(5)   | N <sub>3</sub> -Zn <sub>1</sub> -N <sub>1</sub> | 106.55(19) |
|                                                                                         |          | O <sub>3</sub> -Zn <sub>1</sub> -N <sub>3</sub> | 115.38(13) | Zn <sub>1</sub> -O <sub>3</sub> | 2.056(5)   | O <sub>1</sub> -Zn <sub>1</sub> -O <sub>3</sub> | 124.5(3)   |
|                                                                                         |          |                                                 |            |                                 |            | N <sub>3</sub> -Zn <sub>1</sub> -O <sub>3</sub> | 89.5(2)    |
|                                                                                         |          |                                                 |            |                                 |            | N <sub>1</sub> -Zn <sub>1</sub> -O <sub>3</sub> | 107.6(2)   |

**Table SI-3:**  $\pi$ - $\pi$  interactions observed in compounds 1-10

| Compound    | Cg (I)-Cg (J)         | Cg-Cg Distance (Å) | dihedral angle ( $\alpha$ ) |
|-------------|-----------------------|--------------------|-----------------------------|
| Compound 1  | Cg1 Cg3 <sup>1</sup>  | 3.8633             | 73                          |
|             | Cg2 Cg4 <sup>2</sup>  | 3.8749             | 65                          |
|             | Cg2 Cg5 <sup>2</sup>  | 3.9197             | 47                          |
| Compound 2  | Cg1 Cg3 <sup>1</sup>  | 3.9539             | 58                          |
|             | Cg1 Cg4 <sup>1</sup>  | 3.9321             | 45                          |
|             | Cg2 Cg3               | 3.7119             | 0                           |
|             | Cg5 Cg5 <sup>4</sup>  | 3.8459             | 0                           |
| Compound 3  | Cg1 Cg2 <sup>1</sup>  | 3.9035             | 66                          |
|             | Cg1 Cg3 <sup>1</sup>  | 3.8545             | 58                          |
|             | Cg3 Cg3 <sup>5</sup>  | 3.9174             | 0                           |
|             | Cg4 Cg4 <sup>4</sup>  | 3.8374             | 0                           |
| Compound 4  | Cg1 Cg3 <sup>1</sup>  | 3.8277             | 73                          |
|             | Cg3 Cg5 <sup>4</sup>  | 3.8768             | 13                          |
| Compound 5  | Cg3 Cg3 <sup>6</sup>  | 3.5657             | 0                           |
| Compound 6  | Cg1 Cg3 <sup>1</sup>  | 3.9825             | 41                          |
|             | Cg1 Cg4 <sup>1</sup>  | 3.7395             | 81                          |
|             | Cg4 Cg5 <sup>7</sup>  | 3.7246             | 8                           |
| Compound 7  | Cg1 Cg2 <sup>1</sup>  | 3.9452             | 58                          |
|             | Cg1 Cg3 <sup>1</sup>  | 3.7678             | 62                          |
|             | Cg3 Cg3 <sup>8</sup>  | 3.5682             | 0                           |
|             | Cg4 Cg4 <sup>9</sup>  | 3.5692             | 0                           |
| Compound 8  | Cg8 Cg8 <sup>10</sup> | 3.8388             | 0                           |
| Compound 9  | Cg1 Cg3 <sup>1</sup>  | 3.9358             | 59                          |
|             | Cg1 Cg4 <sup>1</sup>  | 3.8863             | 51                          |
|             | Cg4 Cg4 <sup>10</sup> | 3.6002             | 0                           |
|             | Cg5 Cg5 <sup>5</sup>  | 3.7359             | 0                           |
| Compound 10 | Cg1 Cg3 <sup>1</sup>  | 3.8597             | 74                          |
|             | Cg5 Cg5 <sup>11</sup> | 3.6700             | 0                           |

(1) X,Y,Z; (2) 2-X,-1/2+Y,1-Z (3) 1-X,2-Y,-Z; (4) 1-X,1-Y,1-Z; (5) 1-X,-Y,1-Z; (6) -X,1-Y,-Z; (7) 2-X,-Y,-Z;  
 (8) -X,-Y,-Z; (9) -X,1-Y,1-Z; (10) 1-X,1-Y,-Z; (11) 1-X,-Y,-Z

I and J denote ring numbers between which Cg-Cg distance is calculated

**Table SI-4:** Hydrogen bonding interactions in compounds 1-10

| Compound    | Donor --- H...Acceptor            | D - H | H...A | D...A  | D - H...A |
|-------------|-----------------------------------|-------|-------|--------|-----------|
| Compound 1  | O2W --H2WA ..O4A <sup>1</sup>     | 0.95  | 2.03  | 2.9728 | 173       |
|             | N2A --H22A ..O4A <sup>2</sup>     | 0.90  | 1.80  | 2.7043 | 174       |
|             | N4A --H44A ..O1                   | 0.68  | 2.55  | 2.9723 | 122       |
|             | N4A --H44A ..O2W <sup>3</sup>     | 0.68  | 2.25  | 2.8100 | 140       |
|             | N2 --H222 ..O2                    | 0.73  | 2.01  | 2.6909 | 156       |
|             | N4 --H444 ..O1W <sup>4</sup>      | 0.78  | 2.23  | 2.8567 | 137       |
| Compound 2  | O5 --H5 ..O1S <sup>5</sup>        | 0.75  | 1.89  | 2.6304 | 173       |
|             | N2 --H222 ..O3 <sup>6</sup>       | 0.89  | 1.96  | 2.8400 | 169       |
|             | N4 --H444 ..O2                    | 0.88  | 1.94  | 2.7431 | 152       |
| Compound 3  | O1W --H1WA ..O5 <sup>6</sup>      | 0.93  | 2.50  | 3.0107 | 115       |
|             | N2 --H222 ..O2 <sup>7</sup>       | 0.87  | 2.03  | 2.8252 | 151       |
|             | N4 --H444 ..O4 <sup>6</sup>       | 0.82  | 1.91  | 2.6991 | 162       |
| Compound 4  | O1S --H1S ..O2 <sup>6</sup>       | 1.06  | 1.74  | 2.7658 | 162       |
|             | N2 --H222 ..O2                    | 0.88  | 1.90  | 2.7381 | 158       |
|             | N4 --H444 ..O1S                   | 0.92  | 1.88  | 2.7511 | 158       |
| Compound 5  | O 4 --H44 ..O2 <sup>8</sup>       | 0.77  | 1.98  | 2.7234 | 161       |
|             | N 2 --H222 ..O2                   | 0.82  | 2.39  | 3.0601 | 140       |
|             | N 2 --H222 ..O3 <sup>9</sup>      | 0.82  | 2.24  | 2.8620 | 133       |
|             | N 4 --H444 ..O6                   | 0.87  | 1.80  | 2.6409 | 162       |
| Compound 6  | N2 --H2A ..O1S                    | 0.86  | 1.91  | 2.7562 | 166       |
|             | N4 --H4B ..O2                     | 0.86  | 1.97  | 2.7594 | 151       |
| Compound 7  | O1W --H1WA ..O3W <sup>10</sup>    | 0.66  | 2.33  | 2.5790 | 104       |
|             | N2 --H2A ..O1 <sup>11</sup>       | 0.86  | 2.03  | 2.8851 | 172       |
|             | O2W --H2WB ..O3W                  | 0.80  | 2.09  | 2.6443 | 126       |
|             | O2W --H2WA ..O3W <sup>10</sup>    | 0.83  | 2.23  | 2.7946 | 126       |
|             | N4 --H4B ..O1W <sup>12</sup>      | 0.86  | 2.00  | 2.8305 | 162       |
| Compound 8  | O2W --H2WB ..O1W <sup>13</sup>    | 1.01  | 2.56  | 2.9843 | 105       |
|             | O2W --H2WA ..O1W <sup>13</sup>    | 1.02  | 2.48  | 2.9843 | 110       |
|             | N2 --H2A ..O1W <sup>13</sup>      | 0.86  | 1.89  | 2.7233 | 163       |
|             | N3 --H3AB ..O3 <sup>14</sup>      | 0.92  | 2.14  | 3.0261 | 161       |
|             | N3 --H3AA ..O2 <sup>15</sup>      | 0.83  | 2.27  | 3.0709 | 163       |
| Compound 9  | N(2) --H(2A) ..O(3) <sup>16</sup> | 0.86  | 2.01  | 2.8522 | 166       |
|             | N(4) --H(4B) ..O(2)               | 0.86  | 2.10  | 2.7795 | 135       |
| Compound 10 | O1W --H1WA ..O3                   | 1.02  | 2.52  | 3.5231 | 167       |
|             | N2 --H2A ..O2 <sup>7</sup>        | 0.86  | 2.04  | 2.8648 | 160       |
|             | N4 --H4B ..O2                     | 0.86  | 2.60  | 3.1031 | 119       |
|             | N4 --H4B ..O4 <sup>14</sup>       | 0.86  | 1.94  | 2.7394 | 155       |

(1)  $-x, 1/2+y, 1-z$ ; (2)  $1-x, 1/2+y, 2-z$ ; (3)  $1+x, y, z$ ; (4)  $x, y, 1+z$ ; (5)  $2-x, 1-y, 1-z$ ; (6)  $1-x, 1-y, 1-z$ ; (7)  $x, 1/2-y, -1/2+z$ ; (8)  $-1/2+x, 1/2+y, z$ ; (9)  $-x, 1-y, -z$ ; (10)  $1-x, 1-y, -z$ ; (11)  $-x, -y, 1-z$ ; (12)  $-1+x, y, z$ ; (13)  $1/2-x, -1/2+y, 1/2-z$ ; (14)  $1-x, -y, -z$ ; (15)  $3/2-x, -1/2+y, 1/2-z$ ; (16)  $1-x, -y, 1-z$ .
